# Supplementary material
Source: MDPI journal article supplement (https://www.mdpi.com/2079-9284/8/4/110)
Supplement: s1 [file s1]

Supplementary Materials

## ***N*-Succinyl-*S*-farnesyl-*L*-cysteine (SFC): A Novel Isoprenylcysteine Analog with *in vitro* Anti-Inflammatory Activity and Clinical Skin Protecting Properties**

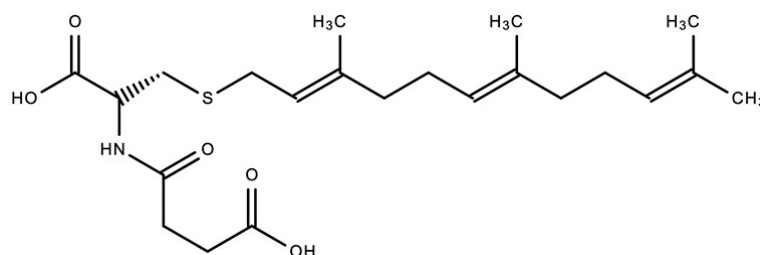

**Figure S1.** Chemical structure of SFC.

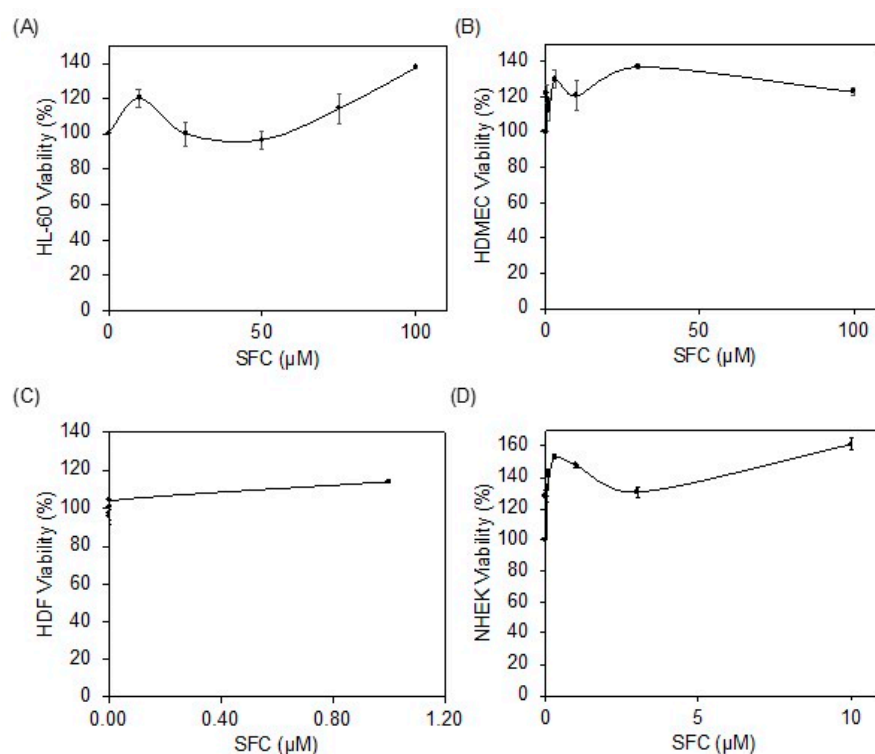

**Figure S2.** Cell viability of cultured cells after 24 hours incubation with SFC; (A) HL-60, (B) HDMEC, (C) HDF and (D) NHEK.

**Table S1.** Clinical formulation ingredient lists.

| <b>No.</b> | <b>1% SFC (SIG990)</b>        | <b>5% Niacinamide</b>  | <b>Vehicle</b>         |
|------------|-------------------------------|------------------------|------------------------|
| 1          | Water                         | Water                  | Water                  |
| 2          | Propylene Glycol              | Propylene Glycol       | Propylene Glycol       |
| 3          | Ethoxydiglycol                | Ethoxydiglycol         | Ethoxydiglycol         |
| 4          | Glycerin                      | Niacinamide            | Glycerin               |
| 5          | Hydroxyethyl Cellulose        | Glycerin               | Hydroxyethyl Cellulose |
| 6          | N-Succinyl-S-Farnesylcysteine | Hydroxyethyl Cellulose | Polysorbate 80         |
| 7          | Polysorbate 80                | Polysorbate 80         | Methylparaben          |
| 8          | Methylparaben                 | Methylparaben          | BHA                    |
| 9          | BHA                           | BHA                    | Disodium EDTA          |
| 10         | Disodium EDTA                 | Disodium EDTA          | Propylparaben          |
| 11         | Propylparaben                 | Propylparaben          | Sodium Hydroxide       |
| 12         | Sodium Hydroxide              | Sodium Hydroxide       | Hydrochloric Acid      |
| 13         | Hydrochloric Acid             | Hydrochloric Acid      |                        |
